# Supplementary material
Source: ML conference proceedings conference paper supplement (https://proceedings.mlr.press/v119/ding20b.html)
Supplement: Supplementary file [file ding20b-supp.pdf]

## Supplementary Material

### 9. Proof of Theorem 1

The kernel function

$$k(x, y) = p(\min\{x, y\})q(\max\{x, y\}),$$

is in fact the Green's function of the Sturm-Liouville operator (Zaitsev & Polyaniin, 2002)

$$\mathcal{L} := \frac{d}{dx}\alpha(x)\frac{d}{dx} + \beta(x).$$

Thus, the inner product induced by  $k$  is

$$\langle f, g \rangle_k = \int_0^1 f \mathcal{L} g dx.$$

For any  $l \in \mathbb{N}$  and  $i \neq j$ , the supports of  $\phi_{l,i}$  and  $\phi_{l,j}$  are  $[(i-1)2^{-l}, (i+1)2^{-l}]$  and  $[(j-1)2^{-l}, (j+1)2^{-l}]$ , respectively. These two supports are disjoint because both  $i$  and  $j$  are odd so  $\langle \phi_{l,i}, \phi_{l,j} \rangle_k = 0$  if  $i \neq j$ . For any  $l, n \in \mathbb{N}$  and any  $i, j$ , the supports  $\text{supt}[\phi_{l,i}]$  and  $\text{supt}[\phi_{n,j}]$  are either disjoint or nested. If they are disjoint, then  $\langle \phi_{n,j}, \phi_{n,i} \rangle_k = 0$ . If they are nested, without loss of generality assume  $l > n$  and  $i \leq j2^{l-n}$ , then because both  $p$  and  $q$  satisfy

$$\mathcal{L}p = \mathcal{L}q = 0,$$

we have

$$\begin{aligned} & \langle \phi_{l,i}, \phi_{n,j} \rangle_k \\ &= \int_{(i-1)2^{-l}}^{(i+1)2^{-l}} \phi_{n,j} \mathcal{L} \phi_{l,i} dx \\ &= \int_{(i-1)2^{-l}}^{(i+1)2^{-l}} \phi_{n,j} \mathcal{L} \frac{p(x)q_{l,i-1} - q(x)p_{l,i-1}}{p_{l,i}q_{l,i-1} - q_{l,i}p_{l,i-1}} dx \\ &= 0. \end{aligned}$$

As a result, we have

$$\langle \phi_{l,i}, \phi_{n,j} \rangle_k = \lambda_{l,i} \delta_{(l,i),(n,j)},$$

where  $\lambda_{l,i}$  is a function of  $l$  and  $i$ .

### 10. Proof of Theorem 3

We need the following lemmas.

**Lemma 1.** Denote  $f_M = \operatorname{argmin}_{f \in \mathcal{F}_M} \|f_0 - f\|_k$ . Then we have

$$R(f_M) - R(f_0) \leq CM^{-2} \log^{4D-4} M \|f_0\|_k^2,$$

for some constant  $C$ .

*Proof.* According to Assumption 2, we can see that

$$R(f_M) - R(f_0) = \mathbb{E}[m_y''(\mathbf{u}^*)(f_M(x) - f_0(x))^2].$$

In view of Assumption 3, it suffices to prove

$$\|f_M - f_0\|_{L^2}^2 = CM^{-2} \log^{4D-4} M \|f_0\|_k^2,$$

for any  $f_0 \in \mathcal{H}_k$  we then can finish the proof. Let  $M = |\{(\mathbf{l}, \mathbf{i}) : |\mathbf{l}| \leq n, \mathbf{i} \in B_1\}|$ . According to theorem 2, we have the following expansion:

$$\begin{aligned} & \|f_M - f_0\|_{L^2} \\ &= \left\| \sum_{|\mathbf{l}| > n} \sum_{\mathbf{i} \in B_1} \left\langle f_0, \frac{\phi_{\mathbf{l}, \mathbf{i}}}{\|\phi_{\mathbf{l}, \mathbf{i}}\|_k} \right\rangle_k \frac{\phi_{\mathbf{l}, \mathbf{i}}(\cdot)}{\|\phi_{\mathbf{l}, \mathbf{i}}\|_k} \right\|_{L^2} \\ &= \left\| \sum_{|\mathbf{l}| > n} \sum_{\mathbf{i} \in B_1} \int_{\mathbf{S}_{\mathbf{l}, \mathbf{i}}} f_0(\mathbf{s}) \mathcal{L} \phi_{\mathbf{l}, \mathbf{i}}(\mathbf{s}) d\mathbf{s} \frac{\phi_{\mathbf{l}, \mathbf{i}}(\cdot)}{\|\phi_{\mathbf{l}, \mathbf{i}}\|_k^2} \right\|_{L^2}. \end{aligned}$$

where  $\mathbf{S}_{\mathbf{l}, \mathbf{i}}$  is the support of  $\phi_{\mathbf{l}, \mathbf{i}}$ . We let

$$v(\cdot)_{\mathbf{l}} := \sum_{\mathbf{i} \in B_1} \int_{\mathbf{S}_{\mathbf{l}, \mathbf{i}}} f_0(\mathbf{s}) \mathcal{L} \phi_{\mathbf{l}, \mathbf{i}}(\mathbf{s}) d\mathbf{s} \frac{\phi_{\mathbf{l}, \mathbf{i}}(\cdot)}{\|\phi_{\mathbf{l}, \mathbf{i}}\|_k^2}.$$

Our first goal is to estimate  $v_{\mathbf{l}}$ . From theorem 2 of (Ding & Zhang, 2018) or direct calculation based on the property of Green's function, we can see that for any  $f \in \mathcal{H}_k$ :

$$\int_{\mathbf{S}_{\mathbf{l}, \mathbf{i}}} f(\mathbf{s}) \mathcal{L} \phi_{\mathbf{l}, \mathbf{i}}(\mathbf{s}) d\mathbf{s} = \left[ \bigotimes_{d=1}^D \Delta_{l_d, i_d} \right] f,$$

where

$$\begin{aligned} \Delta_{l_d, i_d} f &:= \alpha_{l_d, i_d} f \Big|_{x_d=z_{l_d, i_d}} \\ &\quad - \beta_{l_d, i_d-1} f \Big|_{x_d=z_{l_d, i_d-1}} - \beta_{l_d, i_d+1} f \Big|_{x_d=z_{l_d, i_d+1}}, \\ \alpha_{l, i} &= \frac{p_{l, i+1} q_{l, i-1} - p_{l, i-1} q_{l, i+1}}{[p_{l, i+1} q_{l, i} - p_{l, i} q_{l, i+1}][p_{l, i+1} q_{l, i-1} - p_{l, i-1} q_{l, i}]}, \\ \beta_{l, i} &= \frac{1}{p_{l, i+1} q_{l, i} - p_{l, i} q_{l, i+1}}, \end{aligned}$$

and  $\bigotimes$  denotes the tensor product of the  $\Delta_{l, i}$  operators. Since both  $q$  and  $p$  are the solution of the SL-equation, therefore,  $p, q$  are twice differentiable. We have

$$\begin{aligned} & \frac{1}{p_{l, i+1} q_{l, i} - p_{l, i} q_{l, i+1}} \\ &= \frac{2^l}{[p_{l, i+1} q_{l, i} - p_{l, i} q_{l, i}]/2^{-l} - [p_{l, i} q_{l, i+1} - p_{l, i} q_{l, i}]/2^{-l}} \\ &\sim \frac{2^l}{p'_{l, i} q_{l, i} - p_{l, i} q'_{l, i}}. \end{aligned}$$

We notice that  $p'_{l,i}q_{l,i} - p_{l,i}q'_{l,i}$  is the Wronskian of the SL-operator, which is bounded away from 0. Therefore,  $\Delta_{l_d, i_d}$  acting on  $f$  has the following approximation:

$$\begin{aligned} \Delta_{l_d, i_d} f &\sim \frac{\left[ 2f|_{x_d=z_{l_d, i_d}} - f|_{x_d=z_{l_d, i_d-1}} - f|_{x_d=z_{l_d, i_d+1}} \right]}{2^{-l}} \\ &\leq C \max_{j=1, -1} \left\{ \frac{\left| f|_{x_d=z_{l_d, i_d+j}} - f|_{x_d=z_{l_d, i_d}} \right|}{2^{-l}} \right\}. \end{aligned}$$

As a result,  $\bigotimes_{d=1}^D \Delta_{l_d, i_d}$  acting on  $f$  has the following approximation:

$$\begin{aligned} &\bigotimes_{d=1}^D \Delta_{l_d, i_d} f \\ &\leq C \prod_{d=1}^D \max_{j=1, -1} \left\{ \frac{\left| f|_{x_d=z_{l_d, i_d+j}} - f|_{x_d=z_{l_d, i_d}} \right|}{2^{-l_d}} \right\}. \end{aligned}$$

From the same reasoning, we can see that

$$\|\phi_{1,i}\|_k^2 = \prod_{d=1}^D \alpha_{l_d, i_d} \sim 2^{|\mathbf{l}|}.$$

We also Taylor expand  $\phi_{l_d, i_d}$  for each  $1 \leq d \leq D$  up to second order and from direct calculation, we can have

$$\phi_{l_d, i_d}(x) \sim \max \left\{ 0, 1 - \frac{|x - z_{l_d, i_d}|}{2^{-l_d}} \right\} + \mathcal{O}(2^{-l_d}).$$

This gives us the approximation up to second order:

$$\begin{aligned} &\|\phi_{1,i}\|_{L_2}^2 \\ &= \int_{\mathbf{S}_{1,i}} \prod_{d=1}^D \phi_{l_d, i_d}^2(s_d) ds \\ &\sim \int_{\mathbf{S}_{1,i}} \prod_{d=1}^D \left[ \max \left\{ 0, 1 - \frac{|s - z_{l_d, i_d}|}{2^{-l_d}} \right\} \right]^2 ds \\ &= \left( \frac{2}{3} \right)^D 2^{-|\mathbf{l}|} = \left( \frac{1}{3} \right)^D \text{Vol}(\mathbf{S}_{1,i}). \end{aligned}$$

Therefore, we can have the following estimate for  $v_1$ :

$$\begin{aligned} \|v_1\|_{L^2} &= \left\| \sum_{\mathbf{i} \in B_1} \int_{\mathbf{S}_{1,i}} f_0(\mathbf{s}) \mathcal{L} \phi_{1,i}(\mathbf{s}) ds \frac{\phi_{1,i}(\cdot)}{\|\phi_{1,i}\|_k^2} \right\|_{L^2} \\ &\leq \left| 2^{-2|\mathbf{l}|} C \sum_{\mathbf{i} \in B_1} \left[ \bigotimes_{d=1}^D \Delta_{l_d, i_d} f \right]^2 \text{Vol}(\mathbf{S}_{1,i}) \right|^{\frac{1}{2}} \\ &\sim 2^{-|\mathbf{l}|} \left\| \prod_{d=1}^D \frac{\partial}{\partial x_d} f_0 \right\|_{L^2} \\ &\sim 2^{-|\mathbf{l}|} \|f_0\|_k, \end{aligned}$$

where the second line is from the fact that supports of  $\{\phi_{1,i} : \mathbf{i} \in B_1\}$  are disjoint, the third line is from the Riemann integral approximation and the last line is from the energy estimate assumption of SL-operator (see, for instance, section 6.2.2 of (Evans, 2010)). Finally, we have:

$$\begin{aligned} \|f_0 - f_M\|_{L^2} &\leq \sum_{|\mathbf{l}| > n} \|v_1\|_{L^2} \\ &\sim \|f_0\|_k \sum_{|\mathbf{l}| > n} 2^{-|\mathbf{l}|} \\ &= \|f_0\|_k \sum_{i > n} 2^{-i} \sum_{|\mathbf{l}|=i} 1 \\ &= \|f_0\|_k \sum_{i > n} 2^{-i} \binom{i-1}{d-1} \\ &\sim \|f_0\|_k 2^{-n} n^{D-1}, \end{aligned}$$

where the identity of the last line can be verified in (Ding et al., 2019). From (Bungartz & Griebel, 2004) we also have

$$M = \mathcal{O}(2^n n^{D-1}).$$

We can substitute this identity to the previous equation to have the final result.  $\square$

The  $(\epsilon, L_\infty)$ -covering number of a function space  $\mathcal{F}$ , denoted as  $N(\epsilon, \mathcal{F}, \|\cdot\|_{L_\infty})$ , is defined as the smallest number  $N_0$ , so that there exist centers  $f_1, \dots, f_{N_0}$ , and for each  $f \in \mathcal{F}$ , there exists  $f_i$  so that  $\|f - f_i\|_{L_\infty} < \epsilon$ .

**Lemma 2.** *The covering number of the unit ball of  $\mathcal{H}_k$ , denoted as  $\mathcal{F} := \{f \in \mathcal{H}_k : \|f\|_k \leq 1\}$ , is bounded as follows:*

$$\log N(\epsilon, \mathcal{F}, \|\cdot\|_{L_\infty}) = \mathcal{O} \left( \frac{1}{\epsilon} \log^{D-\frac{1}{2}} \frac{1}{\epsilon} \right).$$

*Proof.* When  $k(\mathbf{x}, \mathbf{y}) = e^{-\omega \|\mathbf{x} - \mathbf{y}\|_1}$  or  $k(\mathbf{x}, \mathbf{y}) = \prod_{d=1}^D \min\{x_d, y_d\}$ ,  $\mathcal{H}_k$  is equivalent to the Sobolev space of mixed first derivative  $\mathcal{H}_{\text{mix}}^1([0, 1]^D)$  (Ding et al., 2019). According to 6.6 of (Dung et al., 2016), we can immediately derive the result. When kernel  $k$  differs from these two, the energy property of an SL-operator requires that

$$\begin{aligned} \langle f, f \rangle_k &= \int_{[0,1]^D} f(\mathbf{x}) \left[ \prod_{d=1}^D \mathcal{L} \right] f(\mathbf{x}) d(\mathbf{x}) \\ &\leq C \int_{[0,1]^D} \left| \prod_{d=1}^D \frac{\partial}{\partial x_d} f \right|^2 d\mathbf{x}, \end{aligned}$$

which implies that  $\mathcal{H}_k$  can be embedded on  $\mathcal{H}_{\text{mix}}^1$ . Therefore, the covering number of  $\mathcal{H}_k$  must be bounded by that of  $\mathcal{H}_{\text{mix}}^1$ .  $\square$

Lemma 3 shows the the function classes associated with the learning problem are Donsker. We refer to (van der Vaart & Wellner, 1996) for the definition and properties of Donsker classes. Let  $\mathcal{G}_R := \{L(y, f(\mathbf{x})) : \|f\|_k \leq R\}$ .

**Lemma 3.** *Let  $P$  be the probability measure of  $(\mathbf{x}, y)$ . The space  $\mathcal{G}_R$  is  $P$ -Donsker for each  $R > 0$ .*

*Proof.* In view of Theorem 2.5.6 of (van der Vaart & Wellner, 1996), it suffices to prove that

$$\int_0^\infty \sqrt{\log N_{[]}(\epsilon, \mathcal{G}_R, \|\cdot\|_{L_2(P)})} d\epsilon < \infty,$$

where  $N_{[]}(\epsilon, \mathcal{G}_R, \|\cdot\|_{L_2(P)})$  is the covering number with bracketing defined as follows. For function  $g : \mathbb{R}^D \times \mathbb{R} \rightarrow \mathbb{R}$ , its  $L_2(P)$  norm is defined as  $[\mathbb{E}[g(x, y)^2]]^{1/2}$ . Given functions  $g_L, g_U$  such that  $g_L(\mathbf{u}, v) \leq g_U(\mathbf{u}, v)$  for each  $(\mathbf{u}, v)$ , define the bracket  $[g_L, g_U]$  as the set of functions  $\{g : g_L(\mathbf{u}, v) \leq g(\mathbf{u}, v) \leq g_U(\mathbf{u}, v)\}$ . The covering number with bracketing  $N_{[]}(\epsilon, \mathcal{G}_R, \|\cdot\|_{L_2(P)})$  is the smallest number  $N_0$  so that there exist brackets  $[g_{L,1}, g_{U,1}], \dots, [g_{L,N_0}, g_{U,N_0}]$ , such that  $\cup_{i=1}^{N_0} [g_{L,i}, g_{U,i}] \supset \mathcal{G}_R$ , and  $\|g_{U,i} - g_{L,i}\|_{L_2(P)} \leq \epsilon$  for all  $i$ .

Let  $\mathcal{F}_R = \{f : \|f\|_k < R\}$ . We start with the centers  $f_1, \dots, f_{N_0}$  with  $N_0 = N(\epsilon, \mathcal{F}_R, \|\cdot\|_{L_\infty}) = N(\epsilon/R, \mathcal{F}_1, \|\cdot\|_{L_\infty})$  so that for each  $f \in \mathcal{F}_R$ , there exists  $f_i =: \xi(f)$  such that  $\|f - f_i\|_{L_\infty} < \epsilon$ . To bound the covering number with bracketing, we need to construct the associated brackets. The reproduction property implies that  $\|f\|_{L_\infty} \leq c\|f\|_k$  with  $c := \max_x k(x, x)$ . Then for any  $f \in \mathcal{F}_R$ , by mean value theorem,

$$\begin{aligned} |L(y, f(\mathbf{x})) - L(y, \xi(f)(\mathbf{x}))| &\leq \sup_{|\mathbf{u}| < cR} \left| \frac{\partial L}{\partial \mathbf{u}}(y, \mathbf{u}) \right| \epsilon \\ &=: S(y)\epsilon. \end{aligned} \quad (12)$$

Now we define  $g_{L,i}(\mathbf{u}, v) = L(v, f_i(\mathbf{u})) - S(v)\epsilon$  and  $g_{U,i}(\mathbf{u}, v) = L(v, f_i(\mathbf{u})) + S(v)\epsilon$ . Clearly  $g_{L,i} \leq g_{U,i}$  and

$$\|g_{U,i} - g_{L,i}\|_{L_2(P)} = 2\epsilon[\mathbb{E}[S(y)^2]]^{1/2},$$

which is a multiple of  $\epsilon$  according to Assumptions 2-3. Besides, (12) implies that for all  $f$  such that  $\|f - f_i\|_{L_\infty} < \epsilon$ ,  $L(v, f(\mathbf{u})) \in [g_{L,i}, g_{U,i}]$ . Now we invoke Lemma 2 to find that

$$\begin{aligned} &\log N_{[]} (2\epsilon[\mathbb{E}[S(y)^2]]^{1/2}, \mathcal{F}_R, \|\cdot\|_{L_2(P)}) \\ &= \mathcal{O} \left( \frac{R}{\epsilon} \log^{D-\frac{1}{2}} \frac{R}{\epsilon} \right), \end{aligned}$$

which implies the desired result.  $\square$

To bound the generalization error, we observe that

$$\begin{aligned} R(\hat{f}) - R(f_0) &= \left\{ R(\hat{f}) - \frac{1}{N} \sum_{i=1}^N L(y_i, \hat{f}(\mathbf{x}_i)) \right\} \\ &+ \left\{ \frac{1}{N} \sum_{i=1}^N L(y_i, \hat{f}(\mathbf{x}_i)) - \frac{1}{N} \sum_{i=1}^N L(y_i, f_M(\mathbf{x}_i)) \right\} \\ &+ \left\{ \frac{1}{N} \sum_{i=1}^N L(y_i, f_M(\mathbf{x}_i)) - R(f_M) \right\} \\ &+ \left\{ R(f_M) - R(f_0) \right\} =: I_1 + I_2 + I_3 + I_4. \end{aligned}$$

We will bound  $I_1$  and  $I_3$  by applying a uniform error bound of empirical processes. For  $I_2$ , we have

$$I_2 \leq \lambda \|f_M\|_k^2 - \lambda \|\hat{f}\|_k^2 \leq \lambda \|f_0\|_k^2 = \mathcal{O}(N^{-1/2}) \|f_0\|_k^2,$$

where the first inequality follows from the optimality condition

$$\begin{aligned} &\frac{1}{N} \sum_{i=1}^N L(y_i, \hat{f}(\mathbf{x}_i)) + \lambda \|\hat{f}\|_k^2 \\ &\leq \frac{1}{N} \sum_{i=1}^N L(y_i, f_M(\mathbf{x}_i)) + \lambda \|f_M\|_k^2. \end{aligned} \quad (13)$$

The term  $I_4$  is bounded by Lemma 1.

Now we turn to  $I_1$  and  $I_3$ . To show that  $I_1 = \mathcal{O}_p(N^{-1/2})$  and  $I_3 = \mathcal{O}_p(N^{-1/2})$ , it suffices to show that the functions  $L(y, \hat{f}(\mathbf{x}))$  and  $L(y, f_M(\mathbf{x}))$  fall in a Donsker class (van der Vaart & Wellner, 1996) with probability arbitrarily close to one. For  $L(y, f_M(\mathbf{x}))$ , this is clearly true in view of Lemma 3 and the fact that  $\|f_M\|_k \leq \|f_0\|_k$ . Therefore,  $I_3 = \mathcal{O}_p(N^{-1/2})$ . For  $L(y, \hat{f}(\mathbf{x}))$ , it suffices to prove that  $\|\hat{f}\|_k = \mathcal{O}_p(1)$ . To show this result, we start with the optimality condition (13). In view of Assumption 2, we can write

$$\begin{aligned} L(y, f(\mathbf{x})) - L(y, f_0(\mathbf{x})) &= W \cdot (f(\mathbf{x}) - f_0(\mathbf{x})) \\ &\quad + m_y''(u^*)(f(\mathbf{x}) - f_0(\mathbf{x}))^2, \end{aligned}$$

where  $W = m_y'(f_0(\mathbf{x}))$ , and  $u^*$  lies between  $f(\mathbf{x})$  and  $f_0(\mathbf{x})$ . Assumption 1 implies that for any  $\delta \in \mathcal{H}_k$ ,

$$\begin{aligned} 0 &= \frac{\partial}{\partial t} R(f_0 + t\delta) \Big|_{t=0} \\ &= \frac{\partial}{\partial t} \mathbb{E} L(y, f_0(\mathbf{x}) + t\delta(\mathbf{x})) \Big|_{t=0} \\ &= \mathbb{E} [m_y'(f_0(\mathbf{x}))\delta(\mathbf{x})], \end{aligned} \quad (14)$$

where in the last equation we interchange the partial derivative and the expectation, which is valid because of Assumptions 2 and 3. Let  $P_{\mathbf{x}}$  be the probability measure of  $\mathbf{x}$ . Since  $\delta \in \mathcal{H}_k$  is arbitrary, (14) implies

$$0 = \mathbb{E} m_y'(f_0(\mathbf{x})) = \mathbb{E} W.$$

We then invoke (13) and Assumption 2 to find

$$\begin{aligned}
 \lambda \|\hat{f}\|_k^2 &\leq -\frac{1}{N} \sum_{i=1}^N W_i (\hat{f}(\mathbf{x}_i) - f_0(\mathbf{x}_i)) \\
 &+ \left\{ \frac{1}{N} \sum_{i=1}^N L(y_i, f_M(\mathbf{x}_i)) - \frac{1}{N} \sum_{i=1}^N L(y_i, f_0(\mathbf{x}_i)) \right\} \\
 &- V(\hat{f}(\mathbf{x}_i) - f_0(\mathbf{x}_i))^2 + \lambda \|f_0\|_k^2 \\
 &=: J_1 + J_2 + J_3 + J_4, \tag{15}
 \end{aligned}$$

for some  $V > 0$  due to the strong convexity of  $m_y(\cdot)$ . For the first term, we have

$$\begin{aligned}
 J_1 &\leq (\|\hat{f}\|_k + 1) \sup_{f \in \mathcal{H}_k} \frac{1}{N} \sum_{i=1}^N -W_i \frac{f(\mathbf{x}_i) - f_0(\mathbf{x}_i)}{\|f\|_k + 1} \\
 &= (\|\hat{f}\|_k + 1) \mathcal{O}_p(N^{-1/2}),
 \end{aligned}$$

where the last step follows from the fact that  $\mathbb{E}W_i = 0$ ,  $W_i$  is bounded, and Lemma 3.4.3 of (van der Vaart & Wellner, 1996) and the fact that  $\|f - f_0\|_k / (\|f\|_k + 1) = \mathcal{O}(1)$ . Clearly, we have  $J_2 = J_3 + \mathcal{O}_p(N^{-1/2}) = \mathcal{O}_p(N^{-1/2})$  according to the central limit theorem. The third term is clearly non-positive. We also have  $J_4 = \mathcal{O}_p(N^{-1/2})$  by assumption for  $\lambda$ .

Now we conclude from (15) that

$$\lambda \|\hat{f}\|_k^2 \leq \|\hat{f}\|_k \mathcal{O}_p(N^{-1/2}) + \mathcal{O}_p(N^{-1/2}),$$

which implies  $\|\hat{f}\|_k = \mathcal{O}_p(1)$ . This completes the proof.
